# Supplementary figures and images for: Influence of the Vibralung Acoustical Percussor on pulmonary function and sputum expectoration in individuals with cystic fibrosis
Source: PubMed Central journal article supplement — Ther Adv Respir Dis. 2018 Apr 26;12:1753466618770997. doi: 10.1177/1753466618770997 (PMC5961921; doi:10.1177/1753466618770997), 2018-04-26

Supplement Figure 6

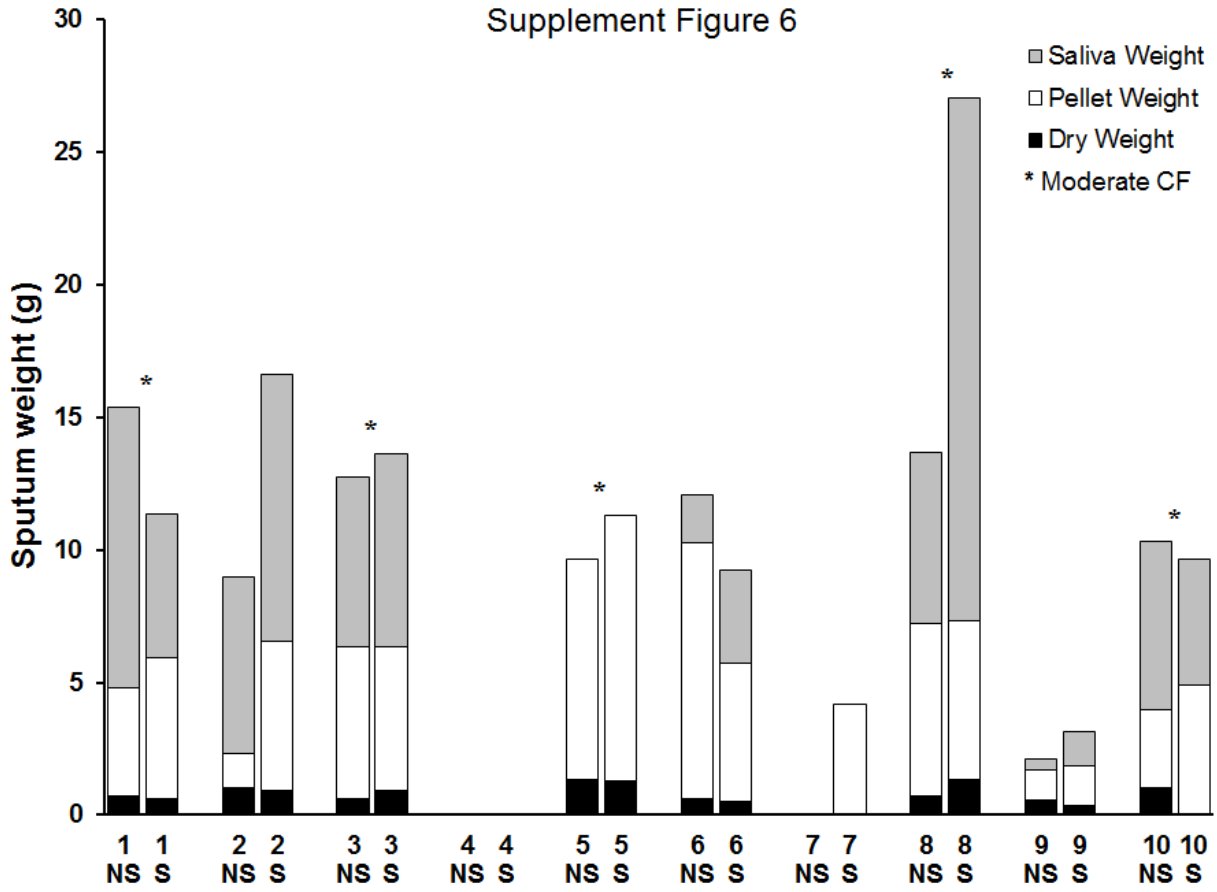

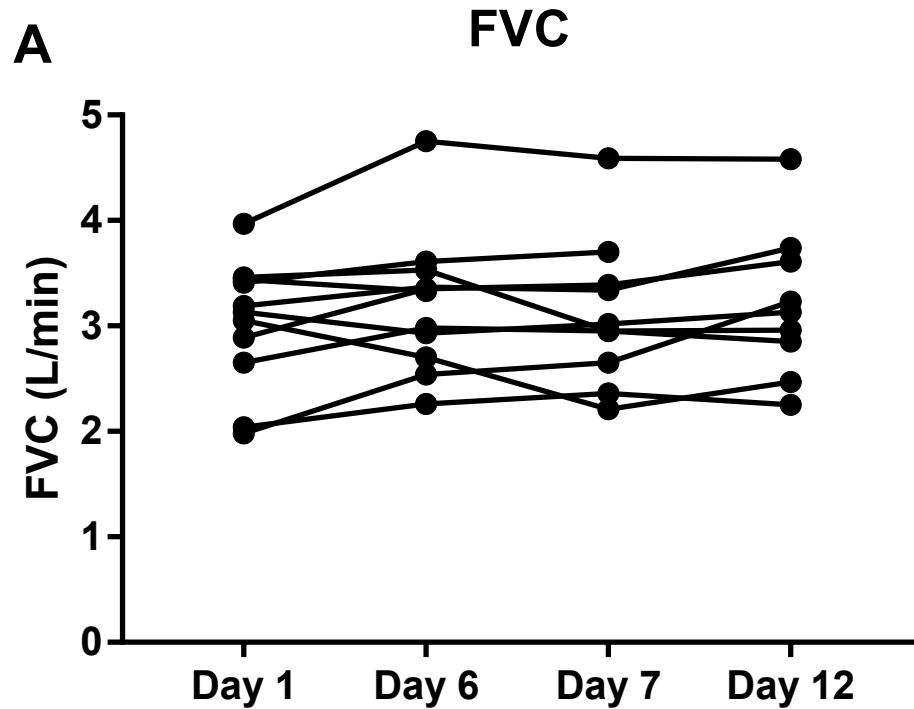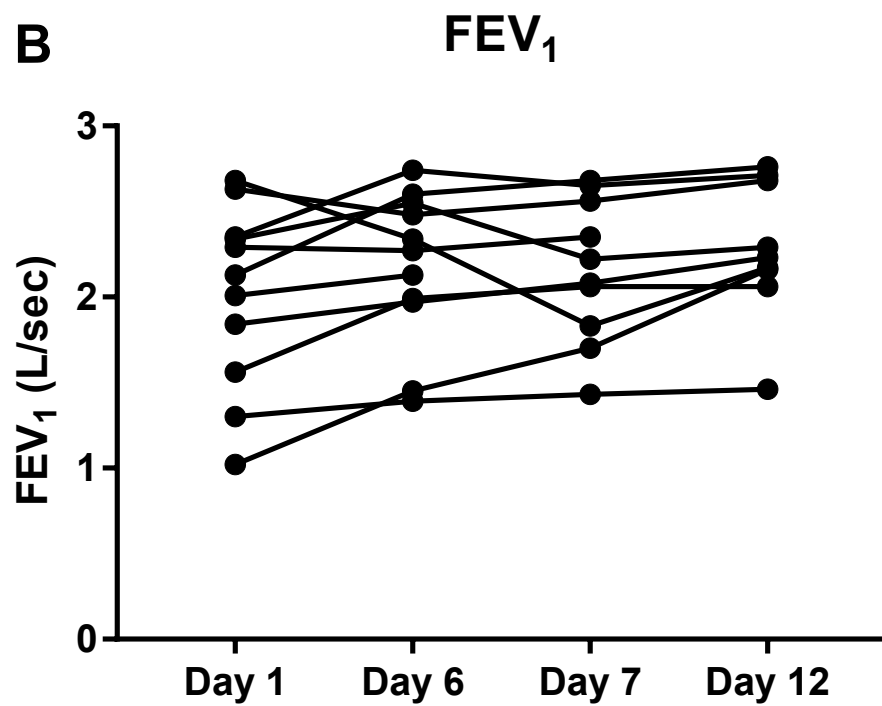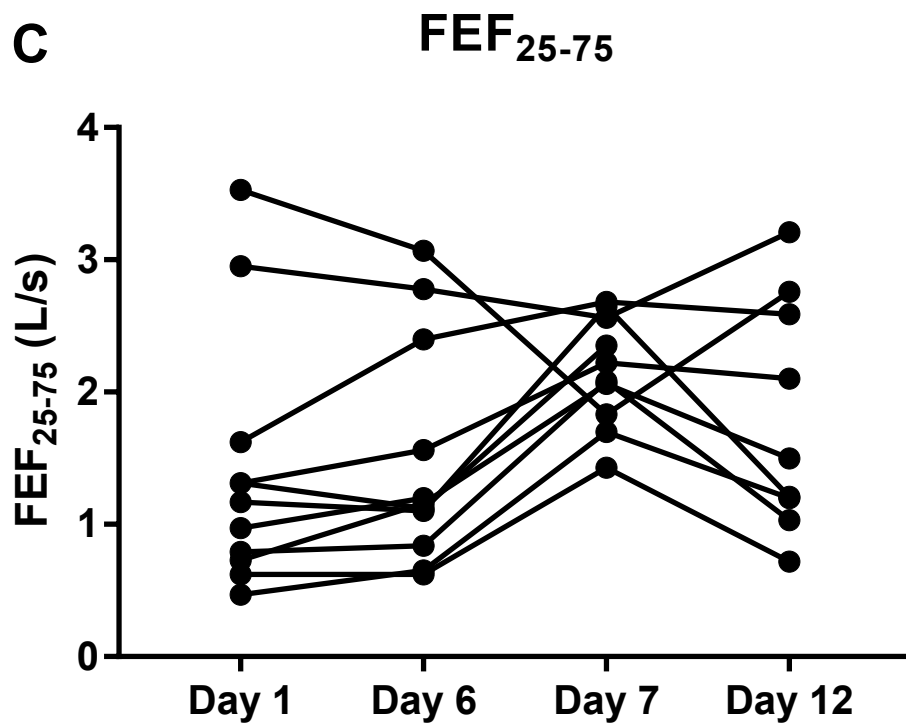

**Supplement  
Figure 7**

Supplement Figure 8

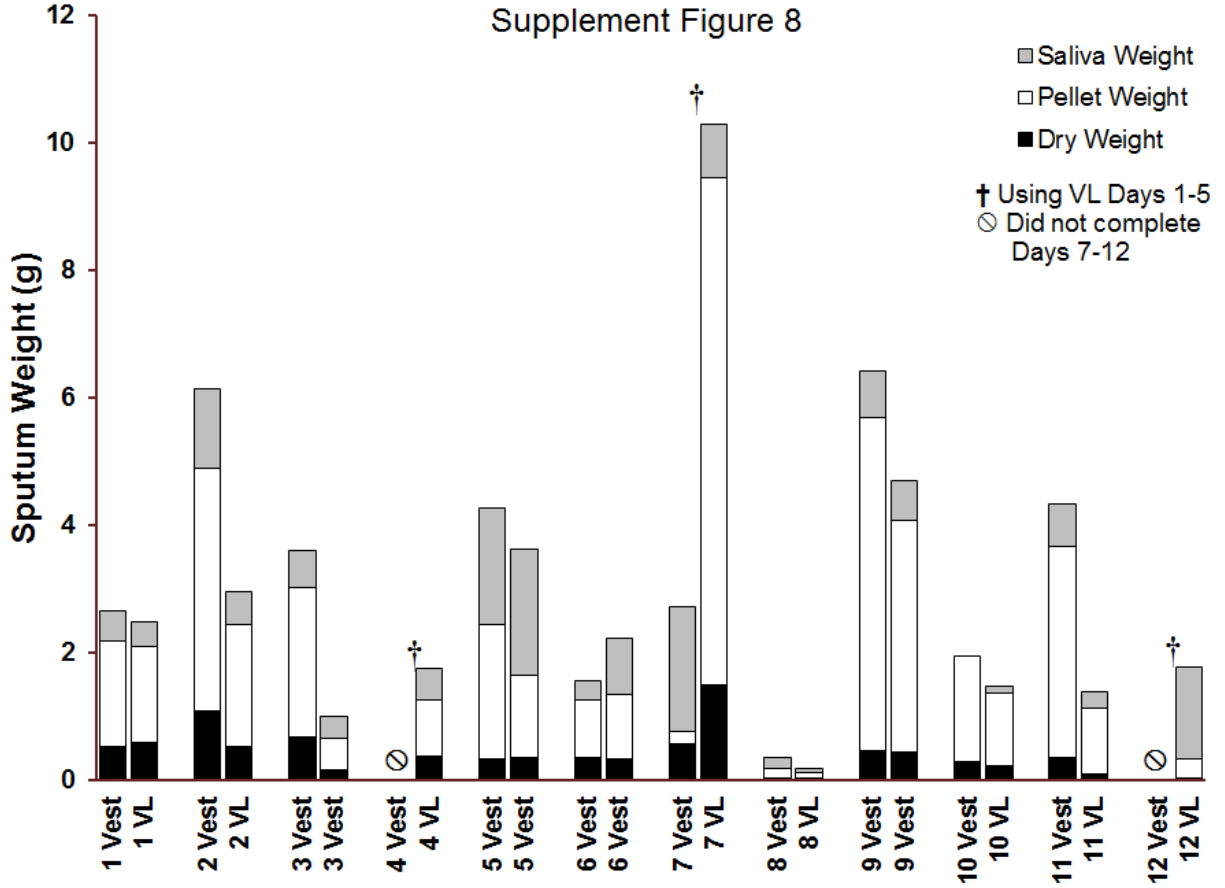

Supplement: Suplemental_Figures.pdf [file Suplemental_Figures.pdf]
